# Supplementary material for: Oncolytic adenovirus H101 ameliorate the efficacy of anti‐PD‐1 monotherapy in colorectal cancer
Source: PubMed Central journal article supplement (PMC9741988; doi:10.1002/cam4.4845), 2022-06-28
Supplement: CAM4-11-4575-s001.pdf [file CAM4-11-4575-s001.pdf]

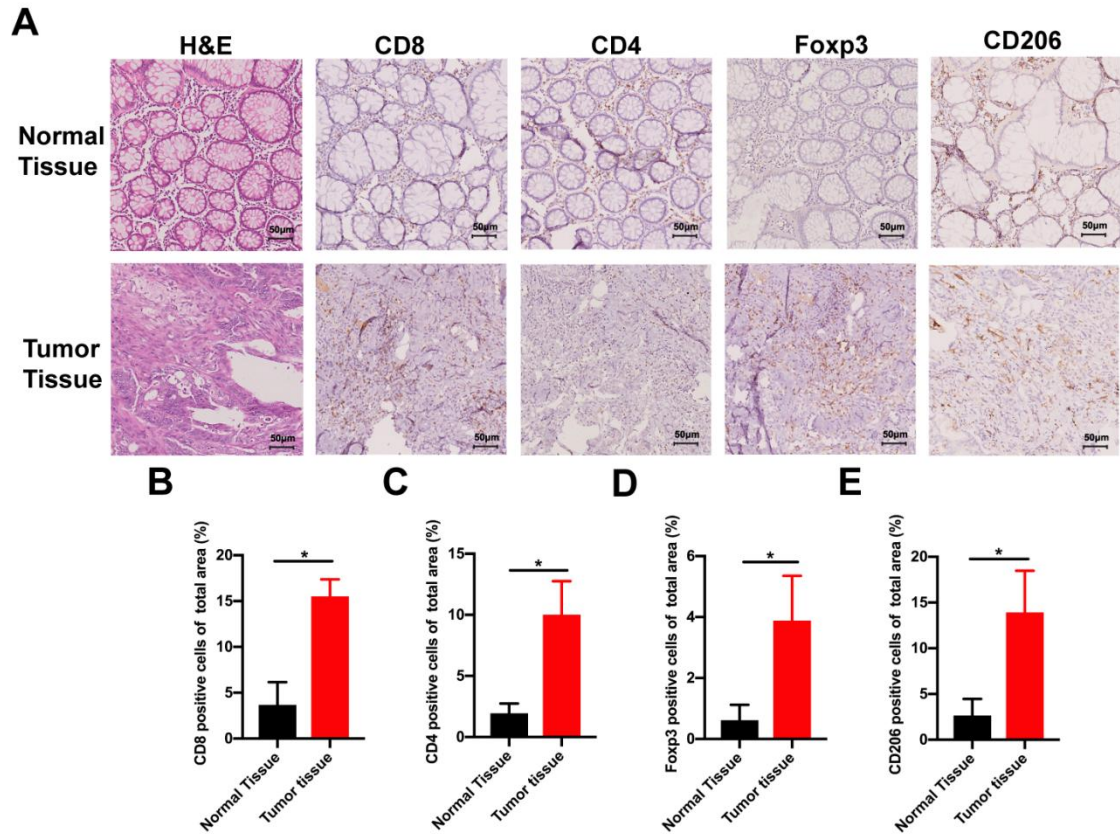

**Figure S1.** H&E and immunohistochemical staining for CRC tissues and normal tissues. (A) Representative images of tumor samples. Immunohistochemical staining for CD8, CD4, Foxp3, and CD206 in the tumor and normal tissues. (B-E): Quantification of positive cells via imageJ software following CD8 (B), CD4 (C), Foxp3 (D), and CD206 (E) staining. Significance is indicated as \*  $p < 0.05$ .

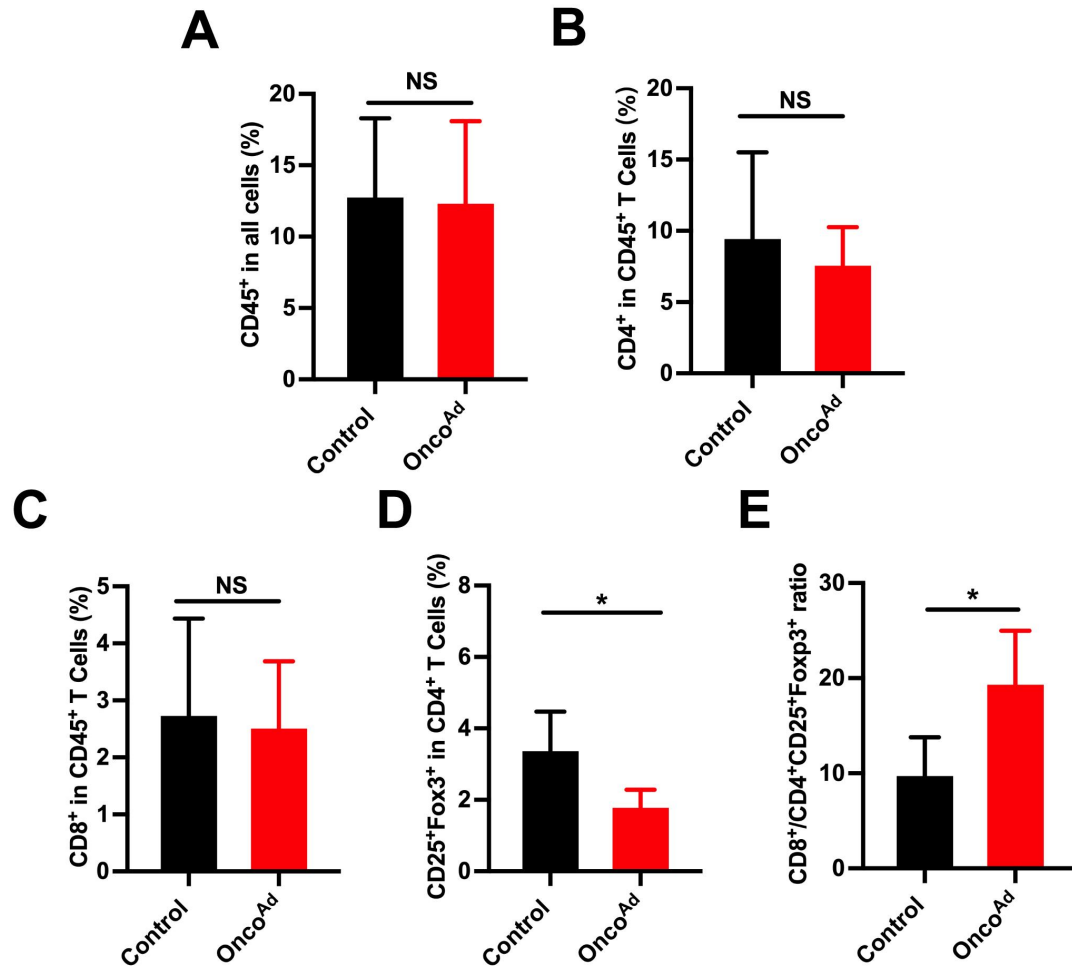

**Figure S2.** Immune response in the blood after Onco<sup>Ad</sup> therapy in the CT26 mouse model. (A-E) Percentages of immune cells treated with Onco<sup>Ad</sup> in the blood. Analysis of the phenotype of CD45<sup>+</sup> T cells (A), CD4<sup>+</sup> T cells (B), CD8<sup>+</sup> T cells (C), and CD25<sup>+</sup>Foxp3<sup>+</sup> T cells (D) after Onco<sup>Ad</sup> therapy. The CD8<sup>+</sup>/Treg ratio after Onco<sup>Ad</sup> therapy in the blood (E). Significance is indicated as \*  $p < 0.05$ .
